# Supplementary material for: The Use of Stem Cell-Derived Neurons for Understanding Development and Disease of the Cerebellum
Source: PubMed Central journal article supplement (PMC6168705; doi:10.3389/fnins.2018.00646), 2018-09-26
Supplement: Data_Sheet_1.pdf [file Data_Sheet_1.pdf]

*Supplementary Material*

**The Use Of Stem Cell-derived Neurons For Understanding  
Development And Disease Of The Cerebellum**

**Samuel P. Naylor<sup>1</sup>, Esther B. E. Becker<sup>1\*</sup>**

<sup>1</sup>University of Oxford, Department of Physiology, Anatomy and Genetics, Oxford, United Kingdom

\* **Correspondence:** Esther B. E. Becker: [esther.becker@dpag.ox.ac.uk](mailto:esther.becker@dpag.ox.ac.uk)

| Reference                           | (Su et al., 2006)                                                                                                                                     | (Salero & Hatten, 2007)                                                                                         | (Muguruma et al., 2010)                                                                                                                                                | (Erceg et al., 2010)                                   | (Srivastava et al., 2013)                                                                                                                                                                           | (Wang et al., 2015)                                                                                                                      | (Higuera et al., 2017)                                                                                                                                                                                                                                                                                                                                         |
|-------------------------------------|-------------------------------------------------------------------------------------------------------------------------------------------------------|-----------------------------------------------------------------------------------------------------------------|------------------------------------------------------------------------------------------------------------------------------------------------------------------------|--------------------------------------------------------|-----------------------------------------------------------------------------------------------------------------------------------------------------------------------------------------------------|------------------------------------------------------------------------------------------------------------------------------------------|----------------------------------------------------------------------------------------------------------------------------------------------------------------------------------------------------------------------------------------------------------------------------------------------------------------------------------------------------------------|
| <b>Cells transplanted</b>           | D9 Math1-GFP+ (mESC)                                                                                                                                  | D24 <i>Pdelc-Egfp</i> -BAC (mESC)                                                                               | D13+2 GAD-GFP Neph3+ (mESC)                                                                                                                                            | D34+ MATH1-GFP+ (hESC)                                 | D18+ DsRed (Math1-induced) (mESC)                                                                                                                                                                   | D20 Neph3-GFP+ (hESC)                                                                                                                    | D20+(p2-6) Actin-GFP+ (mESC)                                                                                                                                                                                                                                                                                                                                   |
| <b>Age mouse</b>                    | P2                                                                                                                                                    | P4-P6                                                                                                           | E15.5                                                                                                                                                                  | P7                                                     | P60                                                                                                                                                                                                 | P0                                                                                                                                       | P1 & Adult                                                                                                                                                                                                                                                                                                                                                     |
| <b>Injection site</b>               | Cerebellum                                                                                                                                            | EGL                                                                                                             | Subventricular space of CP                                                                                                                                             | EGL                                                    | Cerebellum                                                                                                                                                                                          | Cerebellum                                                                                                                               | Cerebellum (vermis & hemisphere)                                                                                                                                                                                                                                                                                                                               |
| <b>Cell number injected</b>         | 5,000-10,000                                                                                                                                          | 1,000                                                                                                           | 10,000                                                                                                                                                                 | 100,000                                                | 400,000                                                                                                                                                                                             | 20,000                                                                                                                                   | 50,000 (P1)<br>75,000 (Ad)                                                                                                                                                                                                                                                                                                                                     |
| <b>Volume injected</b>              | 2-4µl                                                                                                                                                 | 1µl                                                                                                             | 2µl                                                                                                                                                                    | 100-200nl                                              | 2µl                                                                                                                                                                                                 | 1µl                                                                                                                                      | 1µl (P1)<br>1.5µl (Ad)                                                                                                                                                                                                                                                                                                                                         |
| <b>Analysis</b>                     | 5-14 days                                                                                                                                             | 1-15 days                                                                                                       | 1 & 4 wks                                                                                                                                                              | 4 wks                                                  | 1 wk                                                                                                                                                                                                | 4 wks                                                                                                                                    | 25-30 days                                                                                                                                                                                                                                                                                                                                                     |
| <b>Survival rate post-injection</b> | 0.1-0.3%                                                                                                                                              |                                                                                                                 | 3%                                                                                                                                                                     | 14-18%                                                 |                                                                                                                                                                                                     |                                                                                                                                          | 0.17% (P1)<br>2.8% (Ad)                                                                                                                                                                                                                                                                                                                                        |
| <b>Result</b>                       | Migratory Math1+ cells, exhibiting leading and trailing processes associating with PF-like bundles. Expression of DCX, PAX6, GIRK2 and later GABAα6R. | <i>Pdelc-Egfp</i> -BAC cells migrated across ML into IGL. Interaction with MFs. Expression of ZIC2 and GABAα6R. | Grafted cells integrated into PCL and expressed L7 and Calbindin. Characteristic polarity with dendrites growing towards ML. VGluT2 expression along dendritic shafts. | Cells migrated across ML, past PCL and settled in IGL. | DsRed+ cells were detected in cerebellar lobules (mainly in ML) close to injection site. Cells displayed neuronal shape and expressed TUJ1. Started to colonize GL. Some neurons expressed GABAα6R. | 2/12 mice showed GFP+/L7+ cells. Cells were detected in PCL with complex dendrite formation into ML, in ML and extra-cerebellar regions. | P1: 6/8 mice showed GFP labelling in cerebellar cortex. 9% of cells showed morphology of mature PCs and expressed Calbindin and Parvalbumin and received VGluT2-positive inputs. Adult mice: 11/16 mice showed GFP labelling in cerebellar cortex (most in ML, some in PCL and GL or WM). 3.66% of GFP+ cells were Calbindin+ and showed mature PC morphology. |

**Supplementary Table 1.** Summary of published experiments utilizing transplanted stem cell-derived cerebellar neurons to test integration and cell-fate commitment. Ad (Adult), CP (cerebellar plate), D (day of differentiation) ESC (embryonic stem cells), EGL (external granule layer), h (human), IGL (internal granule layer), GL (granule layer), m (mouse), ML (Molecular layer), PCL (Purkinje cell layer), P (postnatal day), p (passage number), PF (Parallel fiber), MF (Mossy fiber), wk (week), WM (white matter).

## References

- Erceg, S., Ronaghi, M., Zipancic, I., Lainez, S., Rosello, M.G., Xiong, C., et al. (2010). Efficient differentiation of human embryonic stem cells into functional cerebellar-like cells. *Stem Cells Dev* 19(11), 1745-1756. doi: 10.1089/scd.2009.0498.
- Higuera, G.A., Iaffaldano, G., Bedar, M., Shpak, G., Broersen, R., Munshi, S.T., et al. (2017). An expandable embryonic stem cell-derived Purkinje neuron progenitor population that exhibits in vivo maturation in the adult mouse cerebellum. *Sci Rep* 7(1), 8863. doi: 10.1038/s41598-017-09348-1.
- Muguruma, K., Nishiyama, A., Ono, Y., Miyawaki, H., Mizuhara, E., Hori, S., et al. (2010). Ontogeny-recapitulating generation and tissue integration of ES cell-derived Purkinje cells. *Nat Neurosci* 13(10), 1171-1180. doi: 10.1038/nn.2638.
- Salero, E., and Hatten, M.E. (2007). Differentiation of ES cells into cerebellar neurons. *Proc Natl Acad Sci U S A* 104(8), 2997-3002. doi: 10.1073/pnas.0610879104.
- Srivastava, R., Kumar, M., Peineau, S., Csaba, Z., Mani, S., Gressens, P., et al. (2013). Conditional induction of Math1 specifies embryonic stem cells to cerebellar granule neuron lineage and promotes differentiation into mature granule neurons. *Stem Cells* 31(4), 652-665. doi: 10.1002/stem.1295.
- Su, H.L., Muguruma, K., Matsuo-Takasaki, M., Kengaku, M., Watanabe, K., and Sasai, Y. (2006). Generation of cerebellar neuron precursors from embryonic stem cells. *Dev Biol* 290(2), 287-296. doi: 10.1016/j.ydbio.2005.11.010.
- Wang, S., Wang, B., Pan, N., Fu, L., Wang, C., Song, G., et al. (2015). Differentiation of human induced pluripotent stem cells to mature functional Purkinje neurons. *Sci Rep* 5, 9232. doi: 10.1038/srep09232.
